# Supplementary material for: Tapwater exposures, residential risk, and mitigation in a PFAS-impacted-groundwater community
Source: Royal Society of Chemistry journal article supplement (doi:10.1039/d5em00005j), 2025-01-01
Supplement: d5em00005j1.xlsx [file d5em00005j1.xlsx]

## Sheet: COVER PAGE
Tapwater Exposures, Residential Risk, and Mitigation in a PFAS Impacted Groundwater Community
Paul M. Bradley,1 Kristin M. Romanok,2 Kelly L. Smalling,2 Lee Donahue,3 Mark P. Gaikowski,4 Randy K. Hines,5 Sara E. Breitmeyer,6 Stephanie E. Gordon,7 Keith A. Loftin,8 Richard Blaine McCleskey,9 Shannon M. Meppelink,10 Molly L. Schreiner2
1U.S. Geological Survey, Columbia, South Carolina, USA; 2U.S. Geological Survey, Lawrenceville, New Jersey, USA; 3Town of Campbell, Campbell, Wisconsin, USA; 4U.S. Geological Survey, Madison, Wisconsin, USA; 5U.S. Geological Survey, La Crosse, Wisconsin, USA; 6U.S. Geological Survey, New Cumberland, Pennsylvania, USA; 7U.S. Geological Survey, Kearneysville, West Virginia, USA; 8U.S. Geological Su…
*Corresponding Author: pbradley@usgs.gov
Contents: Cover Page, 8 Figures, 14 Tables
This research was conducted and funded by the USGS Ecosystems Mission Area, Environmental Health Program. Any use of trade, firm, or product names is for descriptive purposes only and does not imply endorsement by the U.S. Government. This report contains CAS Registry Numbers®, which is a registered trademark of the American Chemical Society. CAS recommends the verification of the CASRNs through …

## Sheet: FIGURE S1. SITE MAP
Figure S1. Map of site locations for the French Island Tapwater Exposure Study, town of Campbell, Wisconsin, 2021–22. Sites 1-11 were sampled for one-time broad-scope target analysis spatial synoptic. Sites 1-3 were sampled 7 times over 3 days for broad-scope target analysis. Source wells for Site 1 (972; deep Mount Simon sandstone aquifer well) and Site 2 (122-124; shallow surficial alluvial aqu…

## Sheet: FIGURE S2. SELECT ORGANIC CLASS
Figure S2. Cumulative concentrations of all detected organics (Organics), per-/poly-fluoroalkyl substance(s) (PFAS), pesticides, and volatile organic chemicals (VOC) in samples collected from the sandstone-aquifer-sourced tapwater location (Site 1, single circle on left for each organic category) and from the alluvial-aquifer-sourced tapwater locations (Sites 2-11, circles and boxplots on right f…

## Sheet: FIGURE S3. SELECT PFAS
Figure S3. Concentrations of perfluorooctane sulfonate (PFOS), perfluorooctanoic acid (PFOA), perfluorononanoic acid (PFNA), perfluorohexane sulfonate (PFHxS), perfluorobutane sulfonate (PFBS), and perfluorobutanoic acid (PFBA) in samples collected from the sandstone-aquifer-sourced tapwater location (Site 1, single circle on left for each PFAS category) and from the alluvial-aquifer-sourced tapw…

## Sheet: FIGURE S4. TQ BY COMPOUND
Figure S4. Toxicity Quotients (TQ) and number of sites (right axes) for inorganic and organic analytes (left axis, in order of decreasing total detections) detected in in samples collected in 2021 in the Town of Campbell, Wisconsin on French Island. Circles are data for individual samples. Boxes, centerlines, and whiskers indicate interquartile range, median, and 5th and 95th percentiles, respect…
[Cyano, cyanotoxins; DBP, disinfection byproducts; Inorg, inorganics; PEST, pesticides; PFAS, per-/poly-fluoroalkyl substances; Pharm, pharaceuticals; SVOC, semi-volatile organic chemicals; VOC, volatile organic chemicals.]

## Sheet: FIGURE S5. TQ PFAS & TQ OTHER
Figure S5. Human health benchmark-based individual toxicity quotient (TQ) values (circles) and cumulative TQ (STQ, sum of all detected; red triangles) for PFAS analytes (top plot) and for inorganic and all other organic analytes (bottom plot) with benchmarks in Table S7a and detected in spatial synoptic TW samples collected in 2021 at Town of Campbell, Wisconsin. Solid-red and orange-dashed lines…

## Sheet: FIGURE S6. EAR BY COMPOUND
Figure S6. Exposure-activity ratios (EAR) and number of sites (right axes) for organic analytes (left axis, in order of decreasing total detections) detected in in samples collected in 2021 in the Town of Campbell, Wisconsin on French Island. Circles are data for individual samples. Boxes, centerlines, and whiskers indicate interquartile range, median, and 5th and 95th percentiles, respectively. …
[DBP, disinfection byproducts; Pest, pesticides; PFAS, per-/poly-fluoroalkyl substances; Pharm, pharaceuticals; SVOC, semi-volatile organic chemicals; VOC, volatile organic chemicals.]

## Sheet: FIGURE S7. TQ-EAR 3-DAY VARY
Figure S7. Human health benchmark-based cumulative toxicity quotients (STQ) for inorganic and organic analytes (bottom plot) with benchmarks in Table S7a (left plot) and ToxCast-based cumulative exposure-activity ratios (SEAR) for organic analytes (right plot) detected in the first (blue diamond) and in subsequent (black circles) temporal tapwater samples collected at Sites 1-3 in 2021 at Town of…

## Sheet: FIGURE S8. TQ DAY-YEAR VARY
Figure S8. Human health benchmark-based cumulative toxicity quotients (STQ) for inorganic and organic analytes with benchmarks in Table S7a in sandstone-aquifer-sourced samples from tapwater Site 001 and source well 972 and in alluvial-aquifer-sourced samples from Site 002 and source wells 122-124 collected during 3-day (tapwater Sites 001 and 002) and quarterly multi-year (source wells 972 and 1…

## Sheet: TABLE S1. SITE INFO
USGS station number	USGS site code	Sampling date (yyyymmdd)	Sampling time (hhmm)	*Well Depth (m)	Aquifer	Fixture type
Short-term sampling locations (broad-scope target analysis)
435200091150001	WITW2021 001	20211018	0800	76	Mount Simon	Potable tap
435200091150001	WITW2021 001	20211018	0830
435200091150001	WITW2021 001	20211018	1440
435200091150001	WITW2021 001	20211019	0730
435200091150001	WITW2021 001	20211019	1500
435200091150001	WITW2021 001	20211020	0730
435200091150001	WITW2021 001	20211020	1450
435200091150002	WITW2021 002	20211018	0900	22-23	Shallow alluvial	Potable tap
435200091150002	WITW2021 002	20211018	0930
435200091150002	WITW2021 002	20211018	1500
435200091150002	WITW2021 002	20211019	0750
435200091150002	WITW2021 002	20211019	1520
435200091150002	WITW2021 002	20211020	0750
435200091150002	WITW2021 002	20211020	1500
435200091160003	WITW2021 003	20211018	1000	20	Shallow alluvial	Potable tap
435200091160003	WITW2021 003	20211018	1030
435200091160003	WITW2021 003	20211018	1630
435200091160003	WITW2021 003	20211019	0820
435200091160003	WITW2021 003	20211019	1550
435200091160003	WITW2021 003	20211020	0820
435200091160003	WITW2021 003	20211020	1530
Spatial sampling locations (broad-scope target analysis)
435100091150004	WITW2021 004	20211018	1100	20	Shallow alluvial	Drinking fountain
435100091160005	WITW2021 005	20211018	1140	20	Shallow alluvial	Potable tap
435300091160006	WITW2021 006	20211018	1220	14	Shallow alluvial	Drinking fountain
435300091160007	WITW2021 007	20211018	1250	20	Shallow alluvial	Non-potable hose bib
435200091160008	WITW2021 008	20211019	0900	20	Shallow alluvial	Non-potable hose bib
435100091160009	WITW2021 009	20211019	0940	25	Shallow alluvial	Non-potable fire department pump station
435100091150010	WITW2021 010	20211019	1020	20	Shallow alluvial	Potable tap
435000091150011	WITW2021 011	20211019	1050	20	Shallow alluvial	Non-potable hose bib
Long-term sampling locations (PFAS only)
	BG122	20210204		22.3-22.9	Shallow alluvial	Non-potable hose bib
	BG122	20210630				Non-potable hose bib
	BG122	20210928				Non-potable hose bib
	BG122	20220111				Non-potable hose bib
	BG122	20220401				Non-potable hose bib
	BG122	20220712				Non-potable hose bib
	BG122	20221004				Non-potable hose bib
	BG122	20221228				Non-potable hose bib
	BG123	20210204		22.2	Shallow alluvial	Non-potable hose bib
	BG123	20210630				Non-potable hose bib
	BG123	20210928				Non-potable hose bib
	BG123	20220111				Non-potable hose bib
	BG123	20220401				Non-potable hose bib
	BG123	20220712				Non-potable hose bib
	BG123	20221004				Non-potable hose bib
	BG123	20221228				Non-potable hose bib
	BG124	20210204		22.2	Shallow alluvial	Non-potable hose bib
	BG124	20210630				Non-potable hose bib
	BG124	20220111				Non-potable hose bib
	BG124	20220401				Non-potable hose bib
	BG124	20220712				Non-potable hose bib
	BG124	20221004				Non-potable hose bib
	BG124	20221228				Non-potable hose bib
	WR972	20210204		62.2	Mount Simon	Non-potable hose bib
	WR972	20210630				Non-potable hose bib
	WR972	20210928				Non-potable hose bib
	WR972	20220111				Non-potable hose bib
	WR972	20220414				Non-potable hose bib
	WR972	20220712				Non-potable hose bib
	WR972	20221004				Non-potable hose bib
	WR972	20221228				Non-potable hose bib
Table S1. Site information for the samples collected from short-term (Sites 1-3) and long-term (Sites BG122-124 and WR972) temporal sampling locations and from single sample spatial locations (Sites 004 - 011) in 2021 in the Town of Campbell, Wisconsin on French Island.
[yyyy, year; mm, month; dd, day; hh, military-hour; mm, minute; m, meters]
[*, approximate total well depth below land surface based on data from Wisconsin Department of Natural Resources, Well Construction Information System.]
[Long-term sampling locations were each sampled quarterly beginning in February, 2021 through December, 2022. One exception being site BG124 was not sampled in September, 2021.]

[truncated: 13 more sheets: TABLE S2. METHODS INFO, TABLE S3. DETECTED INORGANICS, TABLE S4a. DETECTED ORGANICS, TABLE S4b. SURROGATE SUMMARY, TABLE S5. MICROBIOLOGICAL, TABLE S6. FIELD BLANKS, TABLE S7a. BENCHMARKS, TABLE S7b. TQ, TABLE S8a. TOXCAST EXCLUSIONS, TABLE S8b. EAR CHEM, TABLE S8c. EAR ENDPOINT, TABLE S9a. QUARTERLY PFAS METH, TABLE S9b. QUARTERLY PFAS]
